# Supplementary material for: Synthesis of a novel magnetic Caragana korshinskii biochar/Mg–Al layered double hydroxide composite and its strong adsorption of phosphate in aqueous solutions
Source: Royal Society of Chemistry journal article supplement (doi:10.1039/c9ra02052g), 2019-01-01
Supplement: c9ra02052g1.pdf [file c9ra02052g1.pdf]

## 1 Supplementary Information

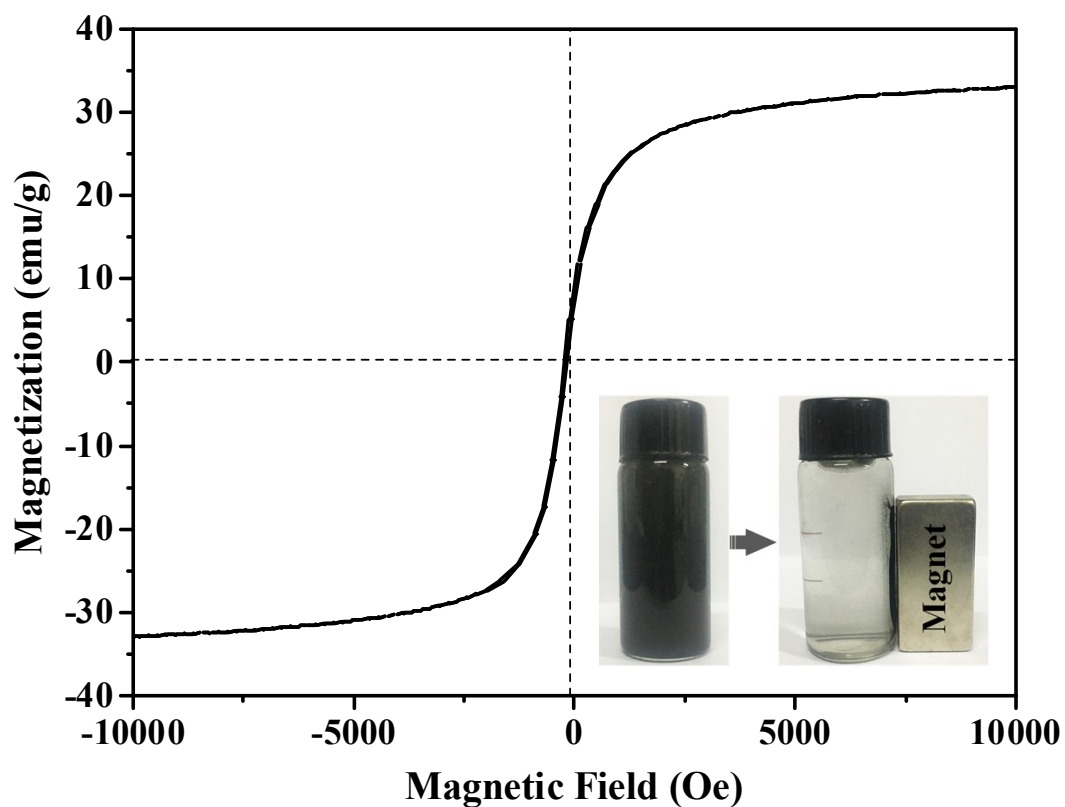

2

3 **Fig. S1.** Magnetization curve of FCB/MAC. Digital image (inset) shows before (right)

4 and after (left) magnetic separation by an ordinary magnet.

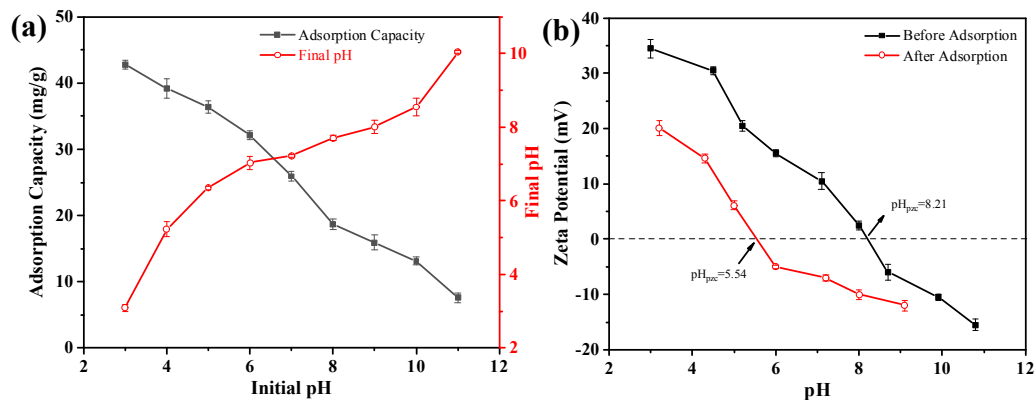

5  
6 **Fig. S2.** (a) Effect of initial pH on phosphate adsorption capacities of FCB/MAC and  
7 final pH (the pH of the solution after adsorption equilibrium) variation of solution, (b)  
8 Zeta potential of the FCB/MAC before and after phosphate sorption at different pH  
9 values. Adsorption conditions: initial phosphate concentration, 50 mg P L<sup>-1</sup>; pH range,  
10 3.0–11.0; temperature, 25 °C; FCB/MAC dosage, 0.05 g; working volume, 50 mL;  
11 contact time, 12 h.

12 **Table S1.**

13 List of kinetic and isotherm models.

| Modles                  | Expression                                                | Parameters         |
|-------------------------|-----------------------------------------------------------|--------------------|
| Pseudo-first-order      | $q_t = q_e(1 - e^{-k_1 t})$                               | $q_e, k_1$         |
| Pseudo-second-order     | $q_t = \frac{k_2 q_e t^2}{1 + k_2 q_e t}$                 | $q_e, k_2$         |
| Intraparticle diffusion | $q_t = k_{id} t^{1/2} + C$                                | $C, k_{id}$        |
| Langmuir                | $q_e = \frac{Q_m K_L C_e}{1 + K_L C_e}$                   | $Q_m, K_L$         |
| Freundlich              | $q_e = K_F C_e^{1/n}$                                     | $K_F, 1/n$         |
| Langmuir-Freundlich     | $q_e = \frac{Q_m K_{LF} C_e^{1/n}}{1 + K_{LF} C_e^{1/n}}$ | $Q_m, K_{LF}, 1/n$ |
| Redlich-Peterson        | $q_e = \frac{K_R C_e}{1 + a C_e^{1/n}}$                   | $K_R, a, 1/n$      |
| Temkin                  | $q_e = \frac{RT}{b} \ln(AC_e)$                            | $A, b$             |

14 Where  $q_t$  and  $q_e$  are the adsorbed amount (mg g<sup>-1</sup>) at an equilibrium concentration ( $C_e$ ,  
15 mg g<sup>-1</sup>) and a given time of phosphate in solution, respectively.  $k_1$ ,  $k_2$ , and  $k_{id}$  are rate  
16 constants for the pseudo-first-order (h<sup>-1</sup>) and pseudo-second-order (g mg<sup>-1</sup>·h<sup>-1</sup>), and  
17 the intraparticle diffusion (mg g<sup>-1</sup>·h<sup>-1/2</sup>) rate constant, respectively.  $Q_m$  denotes the  
18 maximum adsorption capacity.  $K_L$ ,  $K_F$ ,  $K_{LF}$ , and  $K_R$  are the Langmuir (L mg<sup>-1</sup>),  
19 Freundlich (mg g<sup>-1</sup>), Langmuir-Freundlich (L mg<sup>-1</sup>), and Redlich-Peterson (L mg<sup>-1</sup>)  
20 constants, respectively.  $1/n$  is the heterogeneity factor.  $a$  (L mg<sup>-1</sup>) is the Redlich-  
21 Peterson isotherm constant, and  $b$  (J·g mg<sup>-1</sup>) and  $A$  (L mg<sup>-1</sup>) are the Temkin isotherm

22 constant.

23
